# Supplementary material
Source: Research Square preprint supplement (doi:10.21203/rs.3.rs-9893521/v1)
Supplement: Supplementary file 1 [file 5c8e142cffcb6c055f54ec32.docx]

Appendix A

**Appendix A.1. SAS Code Used in the Original Analysis**

**Data import and preprocessing**

filename myfile '/home/u64227463/Project/HOST_Dataset_May_2025.xlsx';
proc import datafile=myfile out=host_data dbms=xlsx replace;
 sheet='SPSS-1 Full';
 getnames=yes;
run;

data host_analyzed;
 set host_data;
 log_JADAS = log(JADAS + 1);
run;

**Descriptive statistics**

proc means data=host_analyzed n mean std median min max nmiss;
 var JADAS ESR CRP HPTG CalcAlpha2 AgeTest;
run;

**Pearson correlation analysis**

proc corr data=host_analyzed pearson nosimple;
 var ESR CRP HPTG CalcAlpha2 AgeTest;
 with JADAS;
run;

**Diagnostic plots**

proc glm data=host_analyzed plots=diagnostics;
 model JADAS = ESR CRP HPTG CalcAlpha2 AgeTest;
run;

proc glm data=host_analyzed plots=diagnostics;
 model log_JADAS = ESR CRP HPTG CalcAlpha2 AgeTest;
run;

**Stepwise regression and final model**

proc reg data=host_analyzed;
 model log_JADAS = ESR CRP HPTG CalcAlpha2 AgeTest / selection=stepwise slentry=0.05;
run;
quit;

proc reg data=host_analyzed;
 model log_JADAS = ESR HPTG / ss2;
run;
quit;

**Gender interaction and confounding checks**

proc glm data=host_analyzed;
 class GenderNum;
 model log_JADAS = ESR HPTG GenderNum ESR*GenderNum / ss3;
run;

proc glm data=host_analyzed;
 class GenderNum;
 model log_JADAS = ESR HPTG GenderNum HPTG*GenderNum / ss3;
run;

proc reg data=host_analyzed;
 model log_JADAS = ESR HPTG;
run;

proc reg data=host_analyzed;
 model log_JADAS = ESR HPTG GenderNum;
run;
quit;
